# Supplementary material for: The conformational rigidity of butane-1,2-diacetals as a powerful synthetic tool
Source: Royal Society of Chemistry journal article supplement (doi:10.1039/b717902b), 2008-01-01
Supplement: b717902b.pdf [file b717902b.pdf]

## Supporting Information for:

### The Conformational Rigidity of Butane-1,2-Diacetals as a Powerful Synthetic Tool

Emilio Lence, Luis Castedo and Concepción González-Bello\*

Laboratorio de Química Orgánica (CSIC) y Departamento de Química Orgánica, Facultad de Química, Universidad de Santiago de Compostela, Avenida de las Ciencias s/n, 15782 Santiago de Compostela, Spain. E-mail: [cgb1@usc.es](mailto:cgb1@usc.es)

Typical  $^1\text{H}$  NMR spectra for butane-1,2-diacetal derivatives have four singlets, two corresponding to the methoxyl groups ( $\sim 3.4\text{--}3.2$  ppm) and two of the methyl groups ( $\sim 1.2\text{--}1.4$  ppm) (Figure 1). As an example the  $^1\text{H}$  NMR spectra of compounds **29** and **74** are shown in Figure 2.

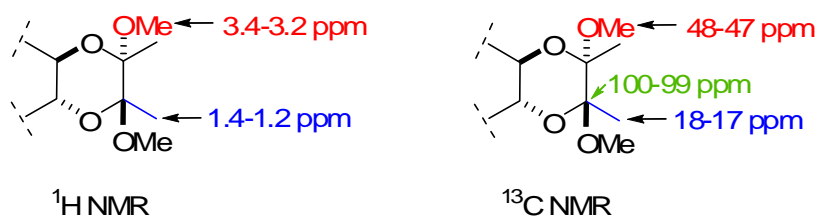

Figure 1

The  $^{13}\text{C}$  NMR spectra for butane-1,2-diacetal derivatives usually have six signals: two at  $\sim 100\text{--}99$  ppm of the quaternary centers, two at  $\sim 48\text{--}47$  ppm of the methoxyl groups and two at  $\sim 18\text{--}17$  ppm corresponding to the methyl groups. An example is shown in Figure 3.

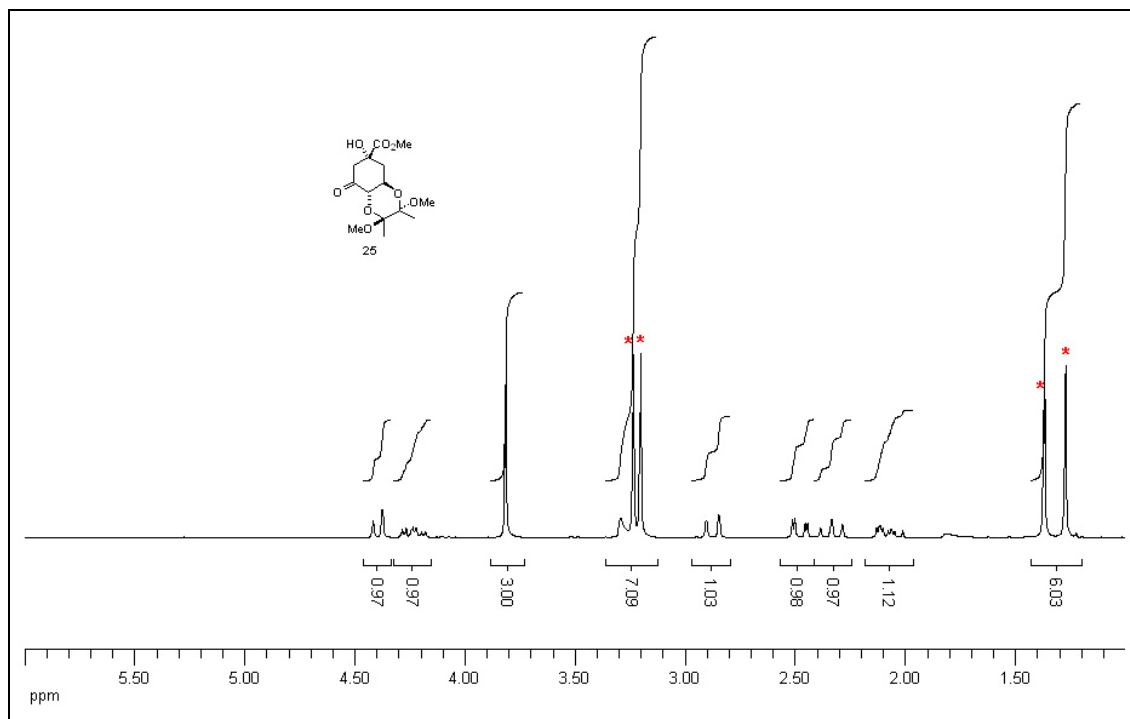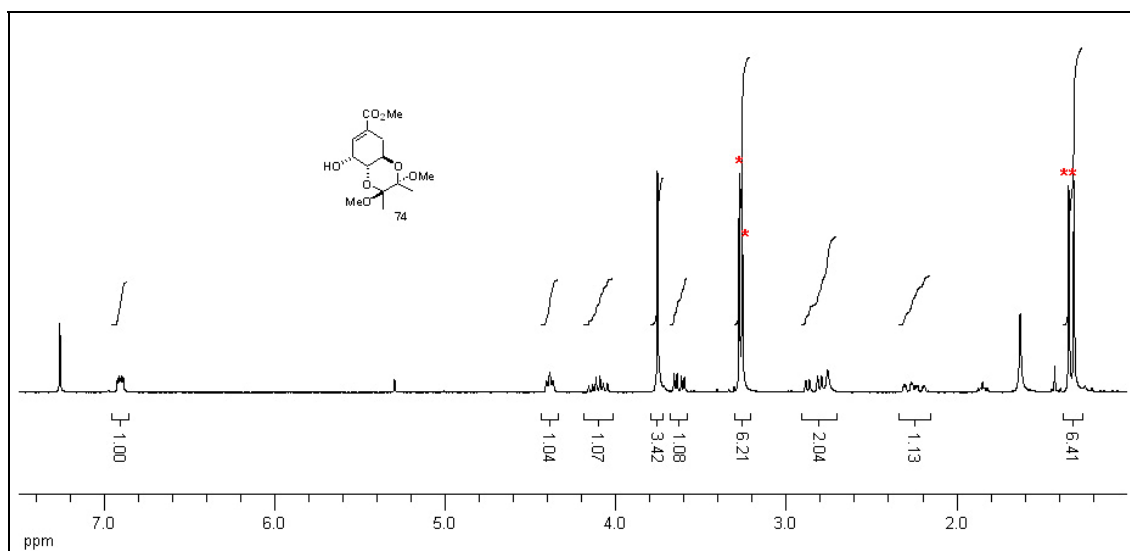

Figure 2. <sup>1</sup>H NMR spectra of compounds 25 and 74.

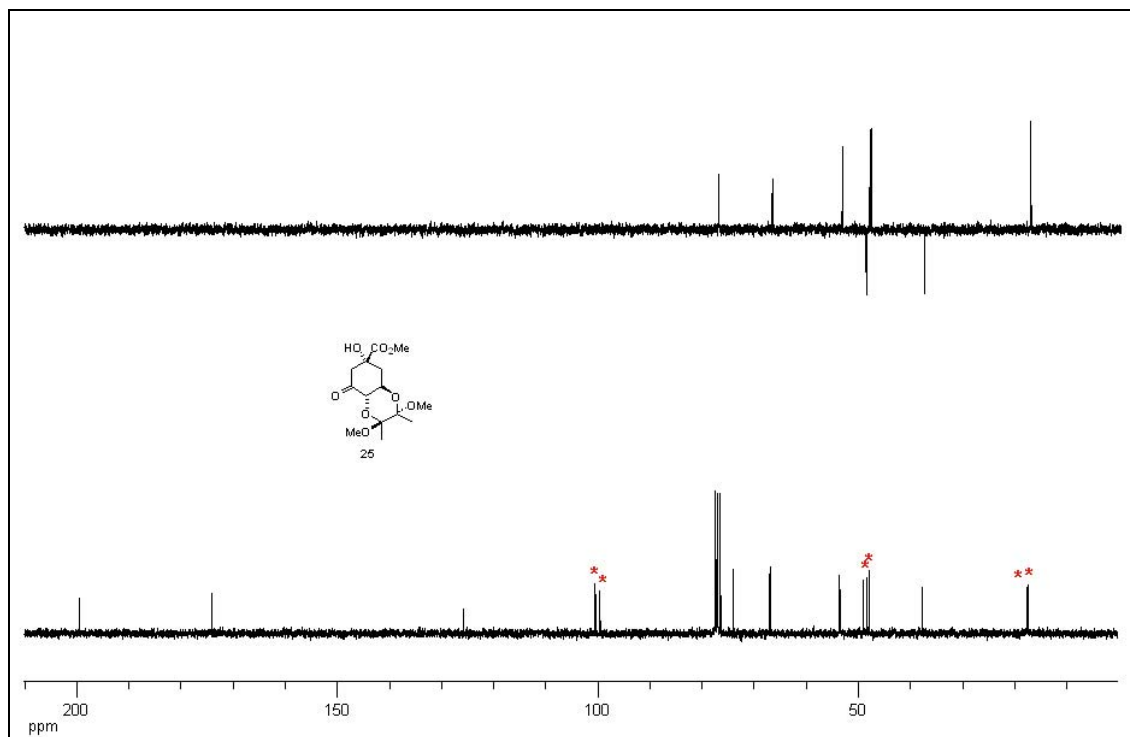

**Figure 3.**  $^{13}\text{C}$  NMR and DEPT spectra of compound **25**.
